# Supplementary material for: Engineering a dual-loop molecular circuit with buffering capability to solve molecular information tasks
Source: Royal Society of Chemistry journal article supplement (doi:10.1039/d4nr02930e), 2024-01-01
Supplement: d4nr02930e1.pdf [file d4nr02930e1.pdf]

### Supplementary information

Engineering a dual-loop molecular circuit with buffering capability to solve molecular information tasks

Xin Liu,<sup>†a</sup> Shuang Cui,<sup>†a</sup> Xun Zhang,<sup>a</sup> Yao Yao,<sup>a</sup> Bang Zhang,<sup>b</sup> Bin Wang,<sup>b</sup> and Qiang Zhang<sup>\*a</sup>

a. School of Computer Science and Technology, Dalian University of Technology, Dalian 116024, China.

b. Key Laboratory of Advanced Design and Intelligent Computing, Ministry of Education, School of Software Engineering, Dalian University, Dalian 116622, China.

<sup>†</sup> These authors contributed equally.

Email: [zhangq@dlut.edu.cn](mailto:zhangq@dlut.edu.cn)

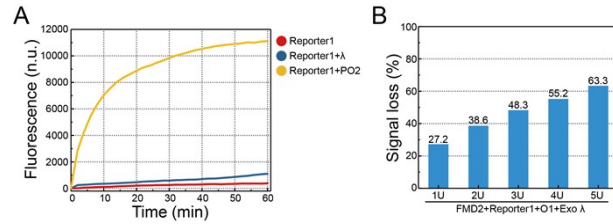

Figure S1. Fluorescence response of Reporter1. (A) The positive and negative curves of Reporter1. The maximum fluorescence intensity of fully triggered Reporter1 is used as the standard positive signal ( $F_{\text{standard}}$ ). (B) Signal loss under the enzyme gradients. The calculation formula for the signal loss is  $F_{\text{loss}} = (F_{\text{standard}} - F) / F_{\text{standard}}$ .  $F$  is the fluorescence intensity measured under the current conditions.

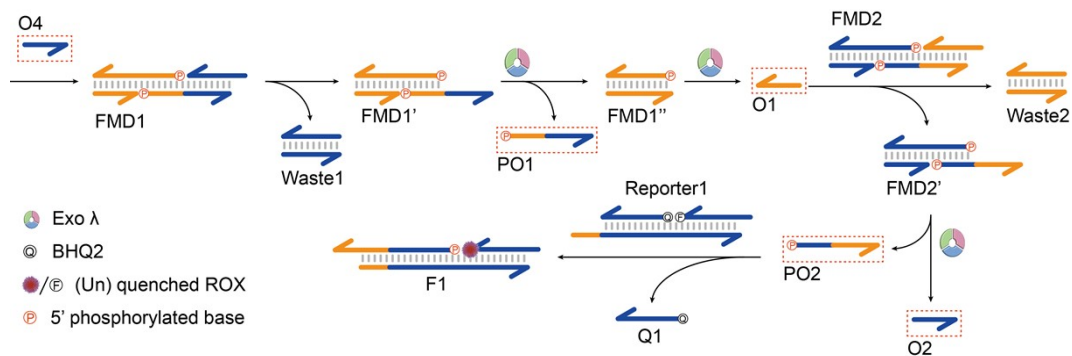

Figure S2. Schematic illustration of the cascaded FMD1–FMD2. In the cascaded FMD1–FMD2, O2 produced by FMD1 is the upstream signal of FMD2.

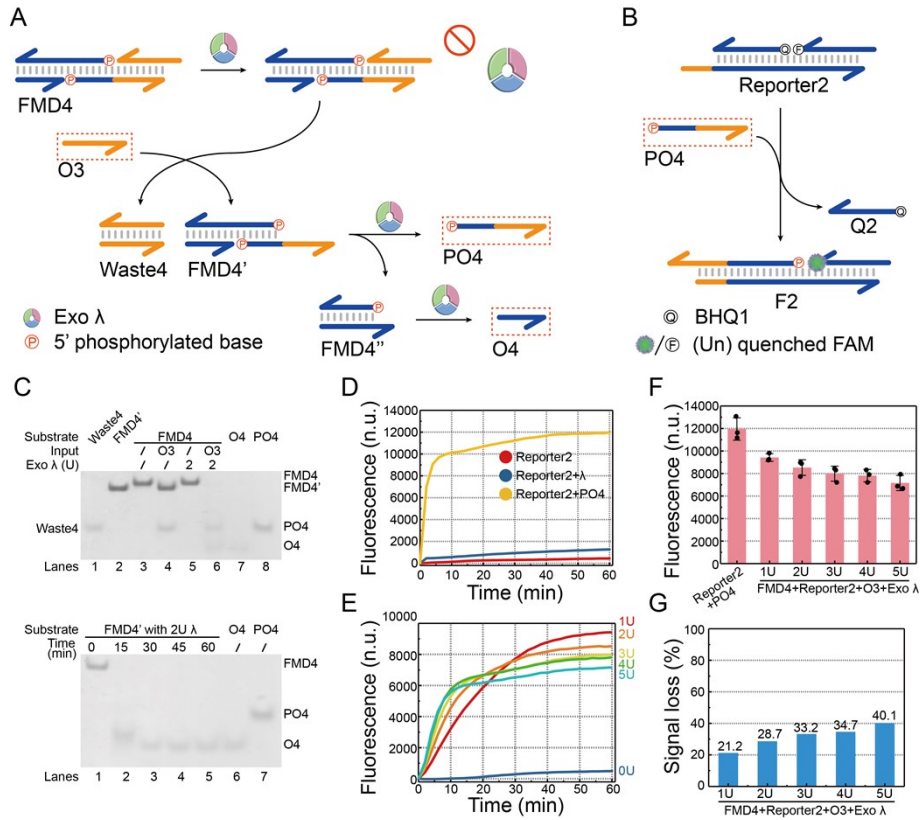

Figure S3. The verification of replaced sequences for FMD. (A) Schematic illustration of FMD4 triggered by O3. (B) Principle of signal response of Reporter2. (C) Gel verification for the hydrolysis of FMD4. Verification of FMD4 triggered by O3 for the first gel, and verification of FMD4' hydrolysis under a time gradient for the second gel. (D) The positive and negative intensities of Reporter2. The maximum fluorescence intensity of fully triggered Reporter2 is used as the standard positive signal ( $F_{standard}$ ). (E) Fluorescence output of FMD4 and Reporter1 triggered by O3. Maximum fluorescence output (F) and signal loss (G) under an enzyme gradient. The calculation formula for the signal loss is  $F_{loss} = (F_{standard} - F) / F_{standard}$ .  $F$  is the fluorescence intensity measured under the current conditions. In both Native PAGE and fluorescence experiments, the substrate or input is 20 pmol, and the fluorescence data represent the average of three replicate experiments.

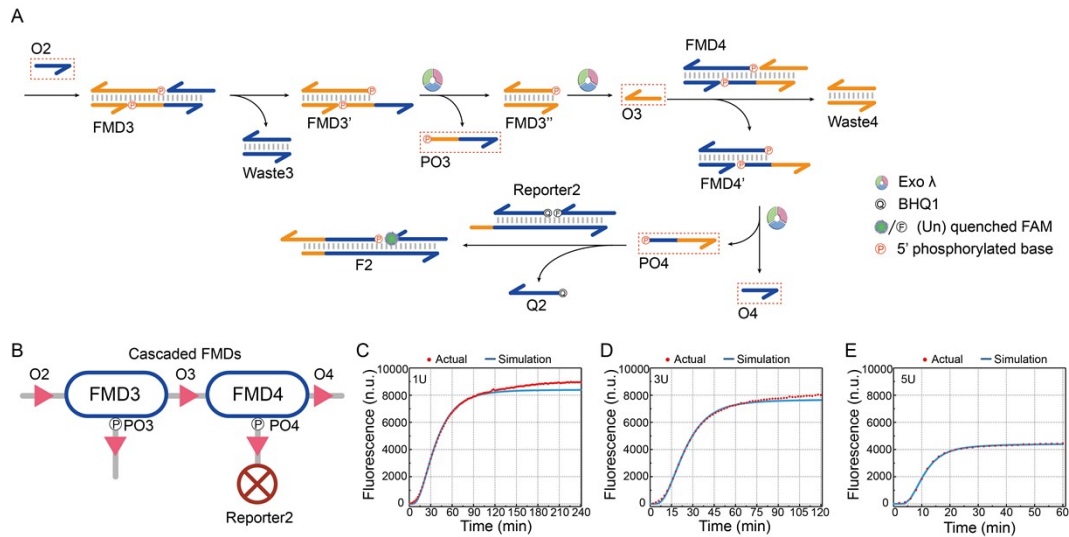

Figure S4. Verification of cascaded FMD3–FMD4. (A) Schematic illustration of the cascaded FMD3–FMD4. In the cascaded FMD3–FMD4, O<sub>3</sub> produced by FMD3 is the upstream signal of FMD4. (B) Schematic diagram of cascaded FMD3–FMD4. Actual fluorescence output and its simulation of cascaded FMDs triggered by O<sub>2</sub> at enzyme of 1 U (C), 3 U (D), and 5 U (E).

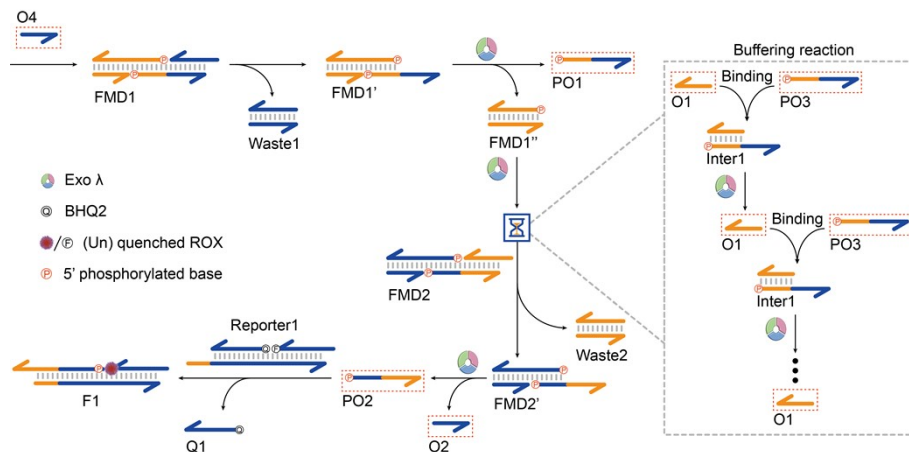

Figure S5. Schematic illustration of the cascaded FMD1–FMD2 with buffering. O<sub>1</sub> is being produced during the hydrolysis of FMD1'', which is then buffered by PO<sub>3</sub> to flow into FMD2 with a delayed time.

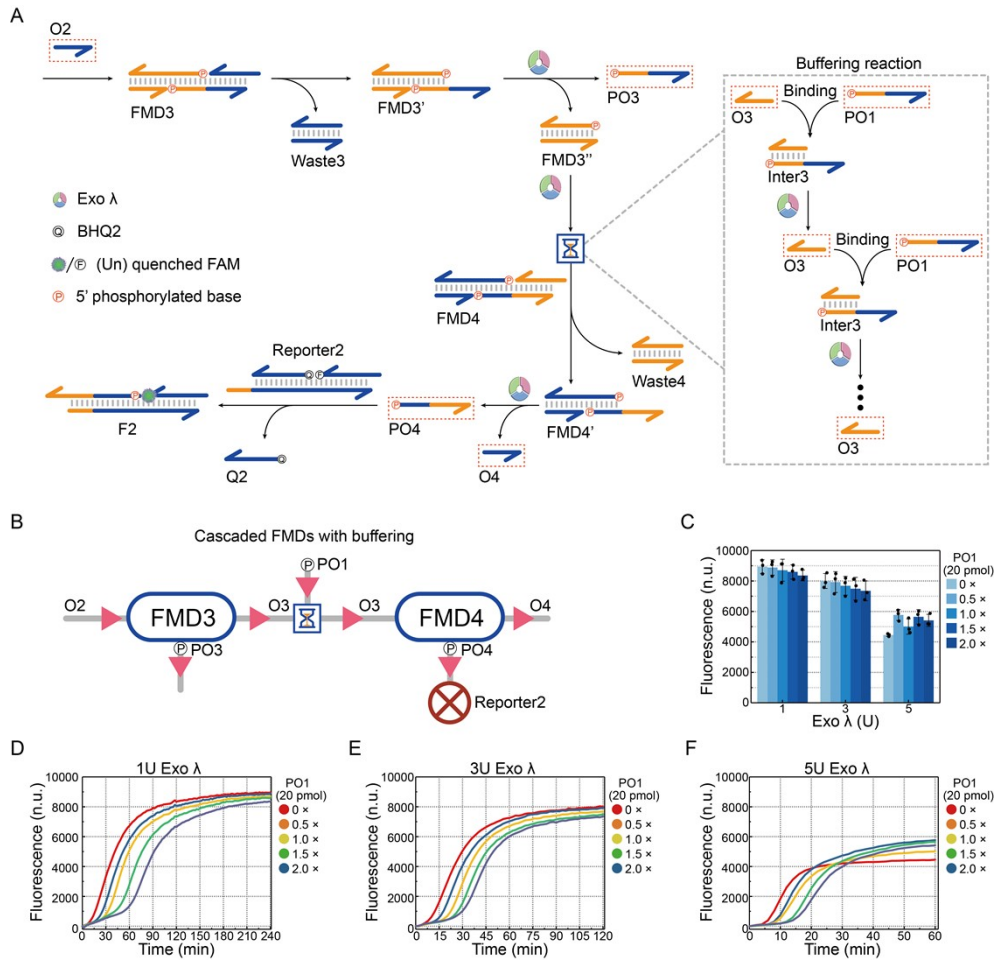

Figure S6. Verification of the cascaded FMD3–FMD4 with buffering. (A) Schematic illustration of the cascaded FMDs with buffering. O<sub>3</sub> is being produced during the hydrolysis of FMD<sub>3</sub>'', which is then buffered by PO<sub>1</sub> to flow into FMD<sub>4</sub> with a delayed time. (B) Schematic diagram of cascaded FMD3–FMD4 with buffering. (C) Maximum fluorescence values of cascaded FMD3–FMD4 with gradient concentration of buffering sequence. Fluorescence curves of cascaded FMD3–FMD4 with gradient concentration of buffering sequence at enzyme of 1 U (D), 3 U (E), and 5 U (F). All the substrates are 20 pmol, input gradient is 0-1.0 × 20 pmol, the gradient of buffering sequence PO<sub>1</sub> is 0-2.0 × 20 pmol, and fluorescence data is the average of three repeated experiments.

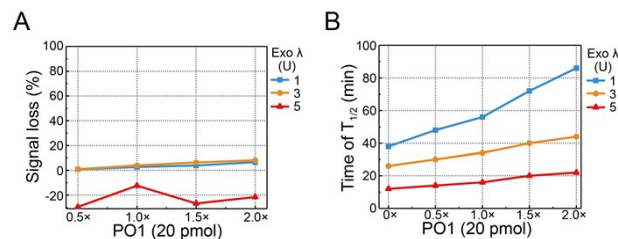

Figure S7. Signal transmission analysis of cascaded FMD3–FMD4 with buffering. (A) Signal loss of cascaded FMD3-FMD4 with gradient concentration of buffering sequence and enzyme. (B) Time delay characteristics of cascaded FMD3-FMD4 with gradient concentration of buffering sequence and enzyme.

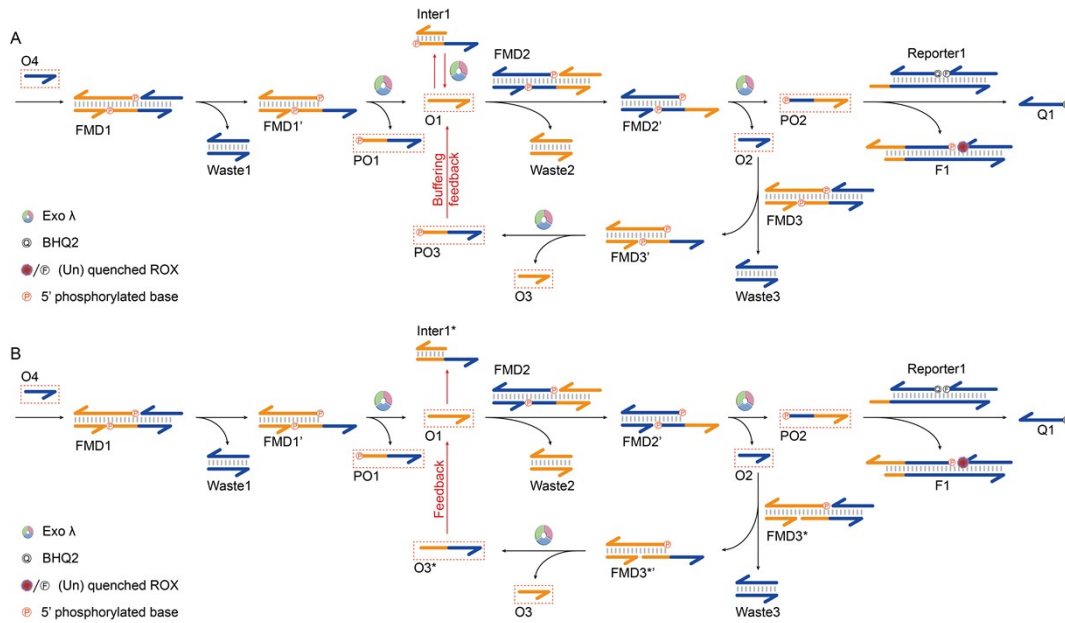

Figure S8. Feedback principle of cascaded FMD1–FMD2–FMD3/FMD3\*. Schematic illustration of the buffering feedback (A) and the feedback without buffering (B). The phosphorylated PO3 is the buffering feedback signal, while the unphosphorylated O3\* is the feedback signal.

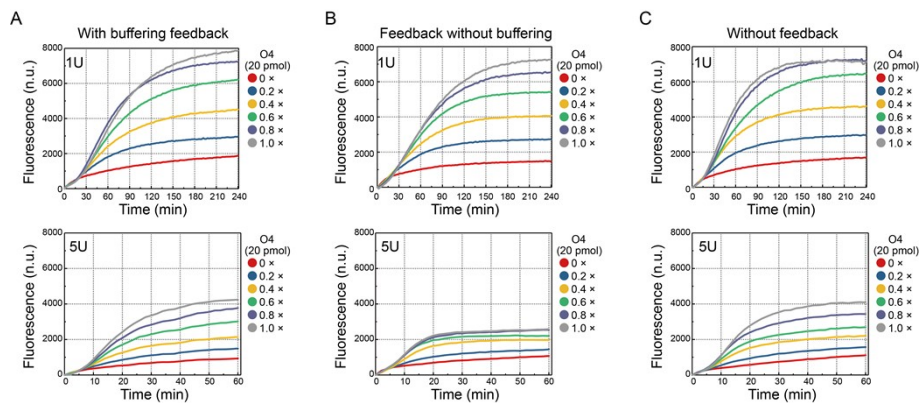

Figure S9. Fluorescence response of the molecular circuits in Figs. 3A, B, and C under gradient concentration of enzyme and input. Fluorescence response of FMD1–FMD2–FMD3 (A), FMD1–FMD2 (B), and FMD1–FMD2–FMD3\* (C) under gradient concentration of enzyme and input. All the substrates are 20 pmol, the input gradient ranged from 0 to  $1.0 \times 20$  pmol, and Exo  $\lambda$  are 1U and 5U. Fluorescence data represents the average of three repeated experiments.

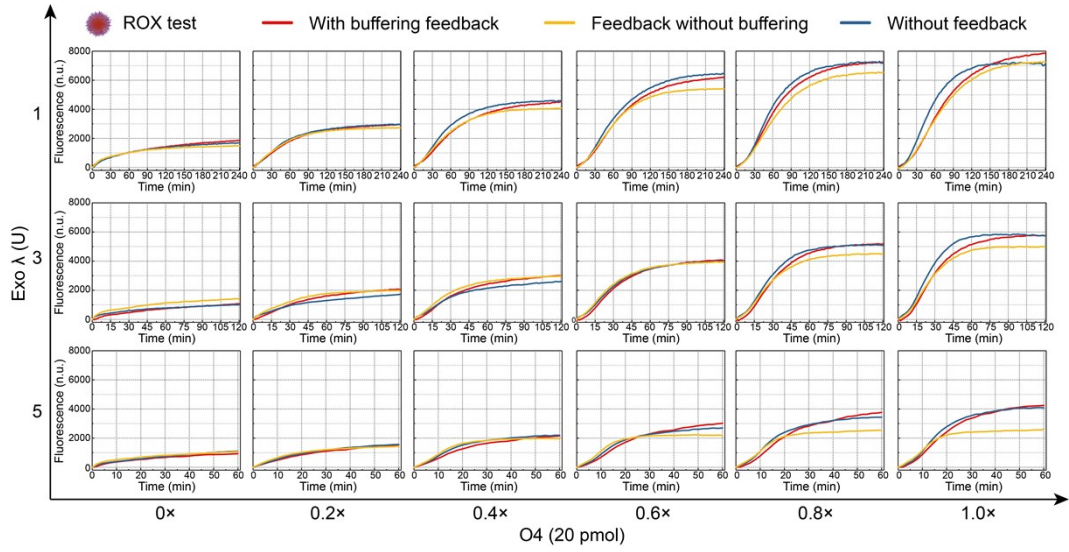

Figure S10. Comparison of fluorescence characteristics of the molecular circuits in Figs. 3A, B, and C under the combination of enzyme gradient and input concentration gradient.

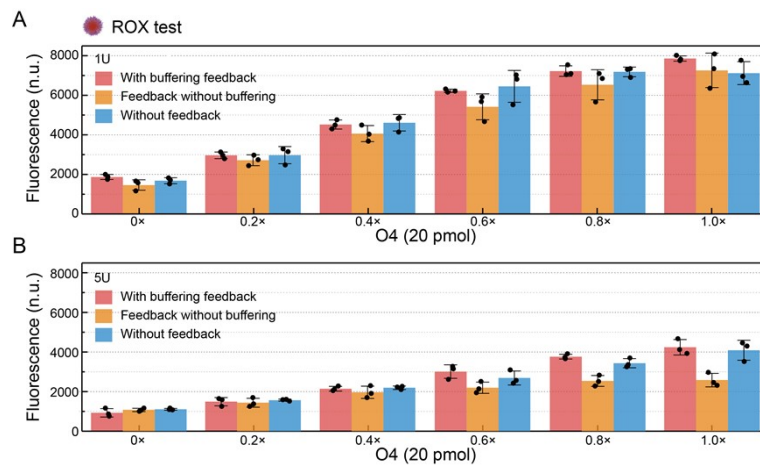

Figure S11. Maximum fluorescence values of the molecular circuits in Figs. 3A, B, and C at enzyme of 1 U (A) and 5 U (B).

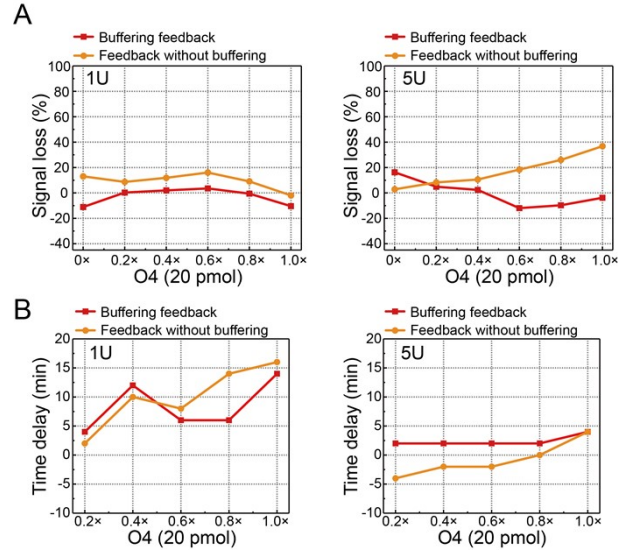

Figure S12. Signal loss (A) and time delay (B) of buffering feedback (Fig. 3A) and feedback without buffering (Fig. 3B) relative to the circuit without feedback (Fig. 3C).

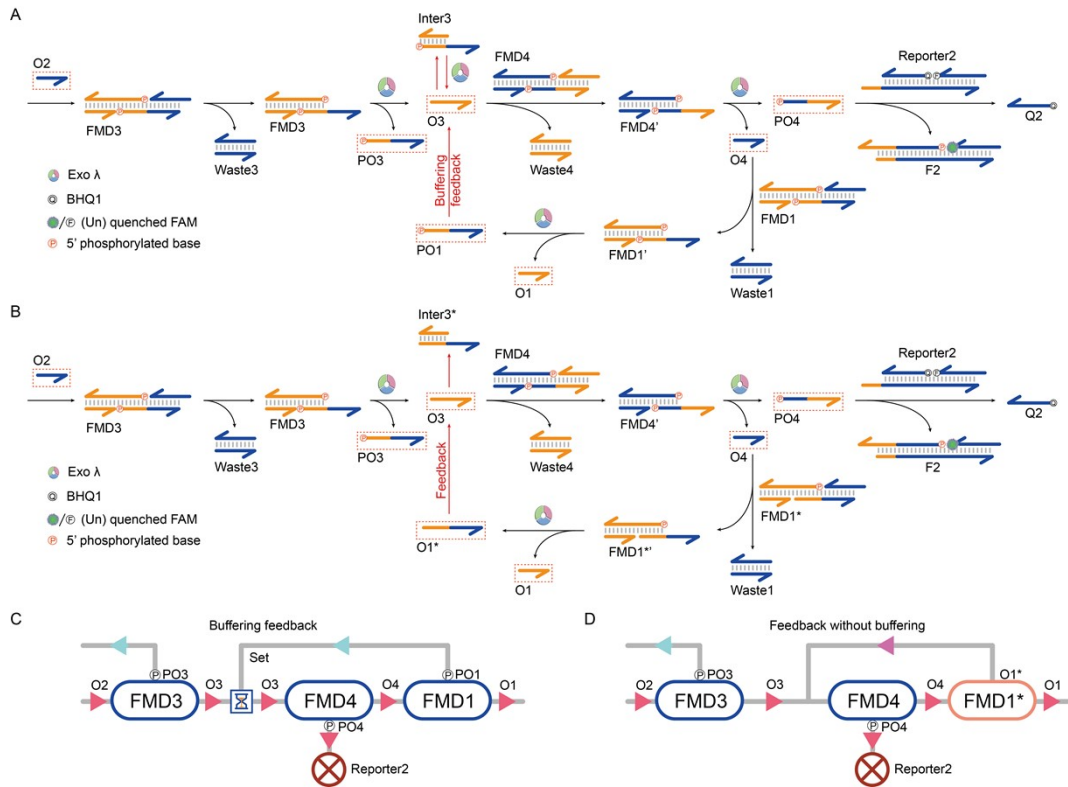

Figure S13. The feedback principle of cascaded FMD3-FMD4-FMD1/FMD1\*. Schematic illustration of FMD3-FMD4-FMD1 (A) and FMD3-FMD4-FMD1\* (B). Schematic diagram of FMD3-FMD4-FMD1 (C) and FMD3-FMD4-FMD1\* (D).



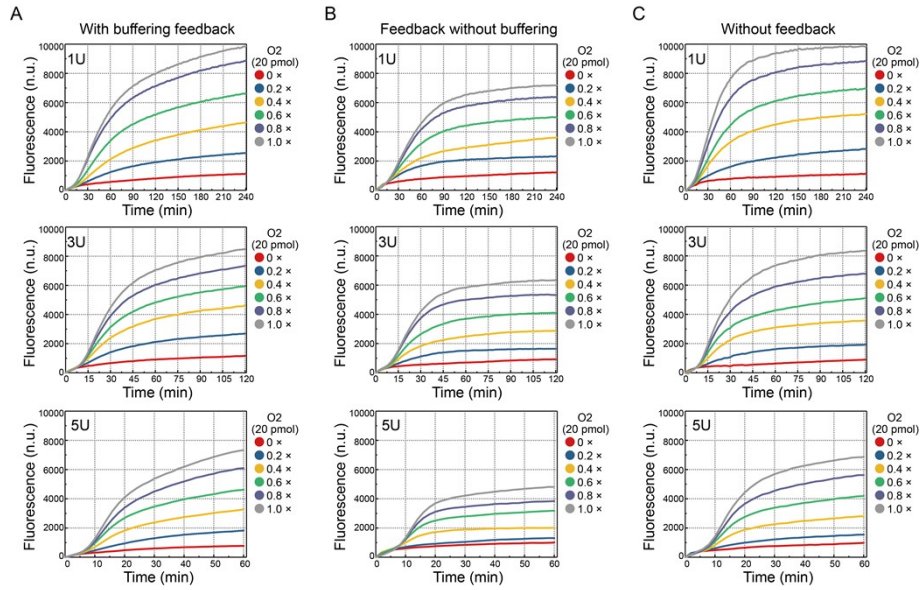

Figure S14. Fluorescence response of the molecular circuits in Figs. S13C, D, and Fig. S4B under the combination of enzyme gradient and input concentration gradient. Fluorescence response of FMD3–FMD4–FMD1 (A), FMD3–FMD4 (B), and FMD3–FMD4–FMD1\* (C). All the substrates are 20 pmol, the input gradient ranged from 0 to  $1.0 \times 20$  pmol, and Exo  $\lambda$  are 1U, 3 U and 5 U. Fluorescence data represents the average of three repeated experiments.

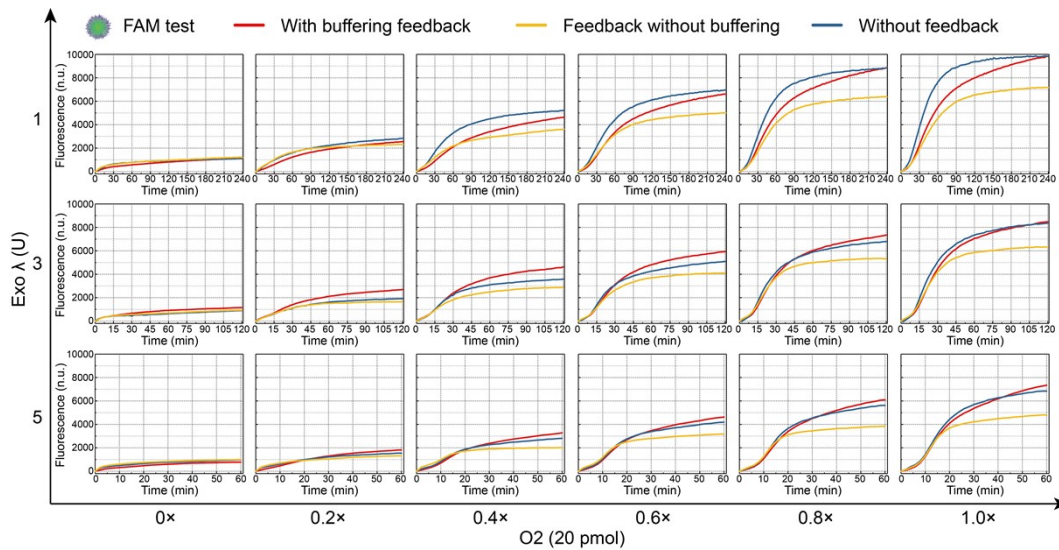

Figure S15. Comparison of fluorescence characteristics of the molecular circuits in Figs. S13C, D, and Fig. S4B under the combination of enzyme gradient and input concentration gradient.

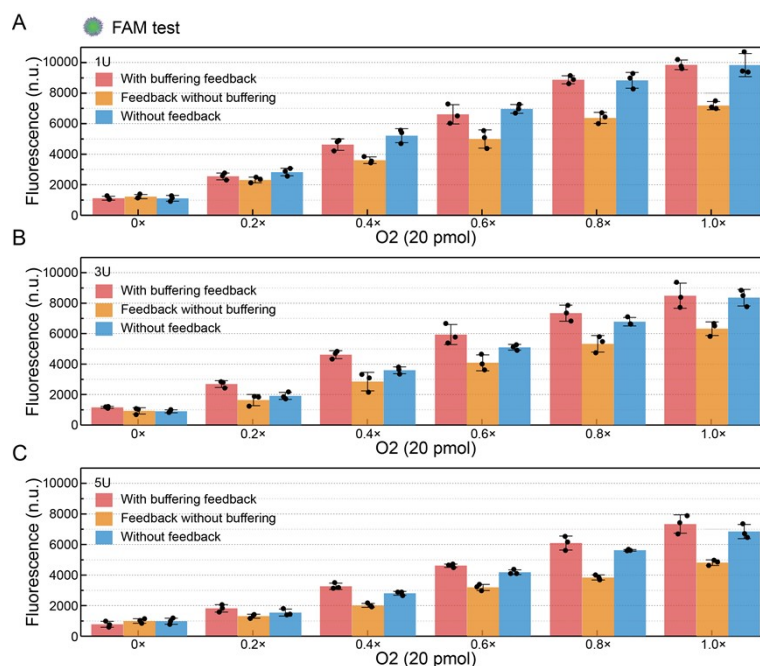

Figure S16. Maximum fluorescence values of the molecular circuits in Figs. S13C, D, and Fig. S4B at enzyme of 1 U (A), 3 U (B), and 5 U (C).

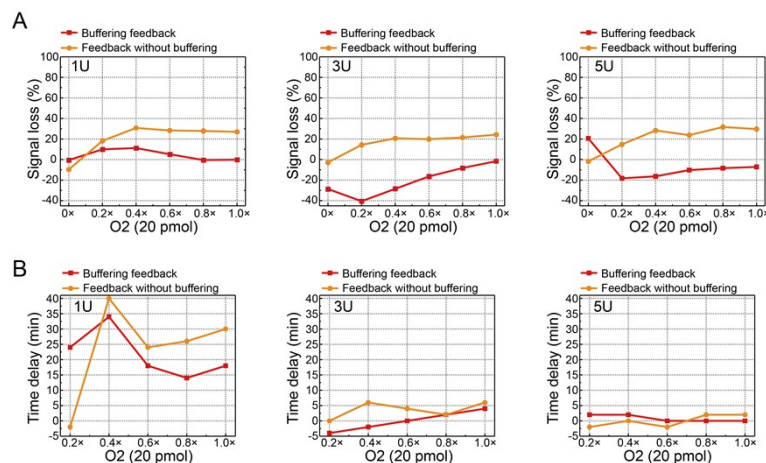

Figure S17. Signal loss (A) and time delay (B) of buffering feedback (Fig. S13C) and feedback without buffering (Fig. S13D) relative to the circuit without feedback (Fig. S4B).

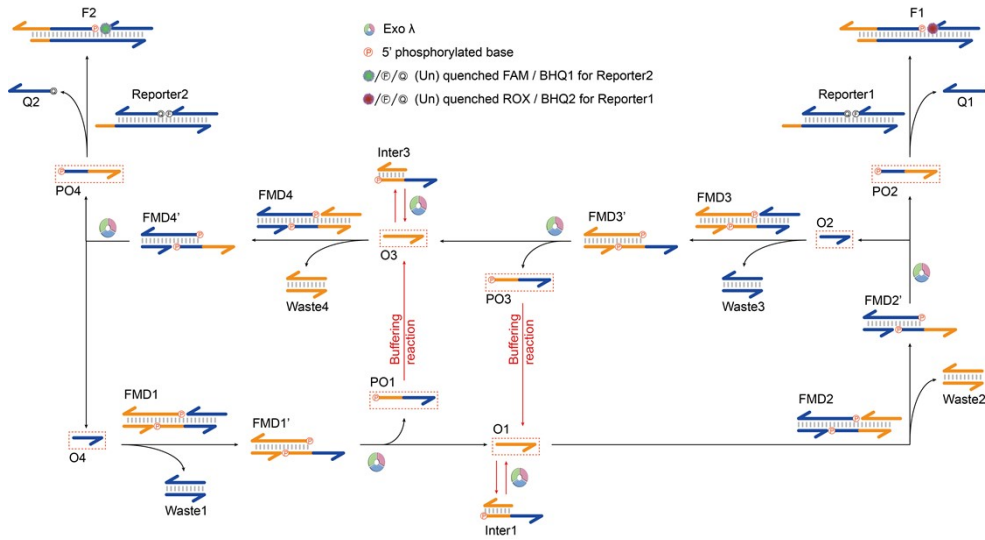

Figure S18. Schematic illustration of dual-loop molecular circuit in Fig. 4A with buffering.

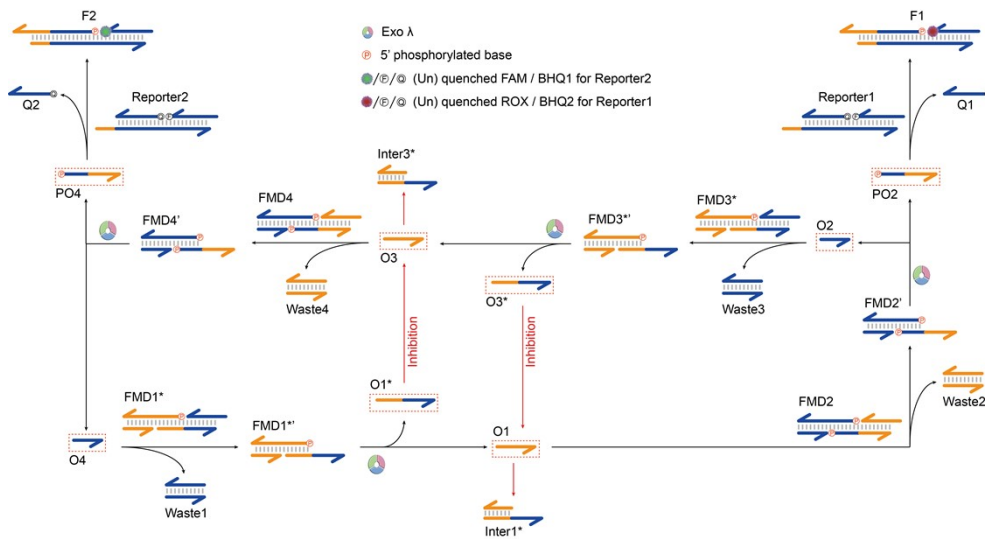

Figure S19. Schematic illustration of dual-loop molecular circuit in Fig. 4B without buffering.

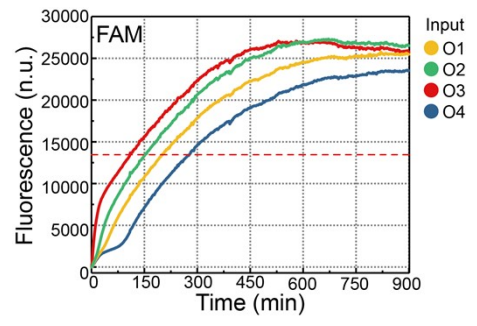

Figure S20. Fluorescence response of the dual-loop buffering circuit in Fig. 4A at different input positions. The red dashed line represents the fluorescence intensity of a 20 pmol reporter, and the fluorescence data represents the average of three repeated experiments.

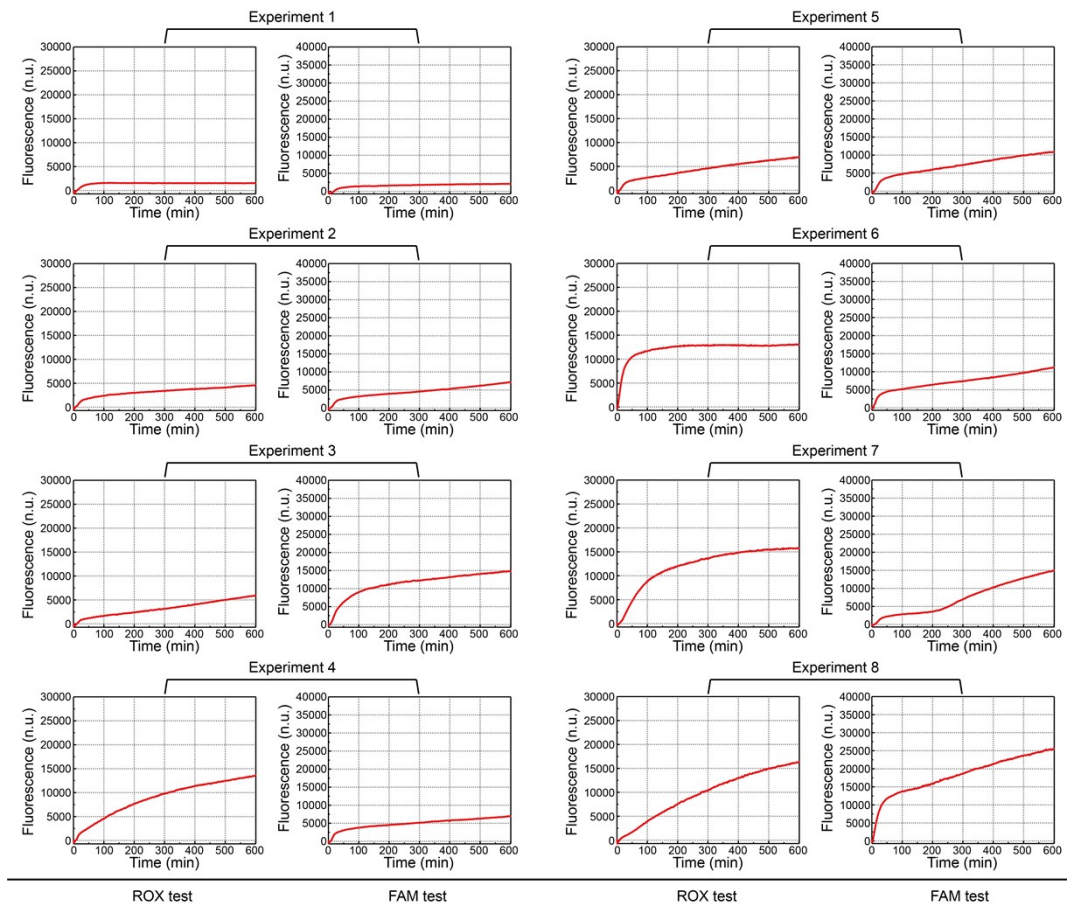

Figure S21. Experiments 1–8 in L-16 orthogonal array of Table S1.

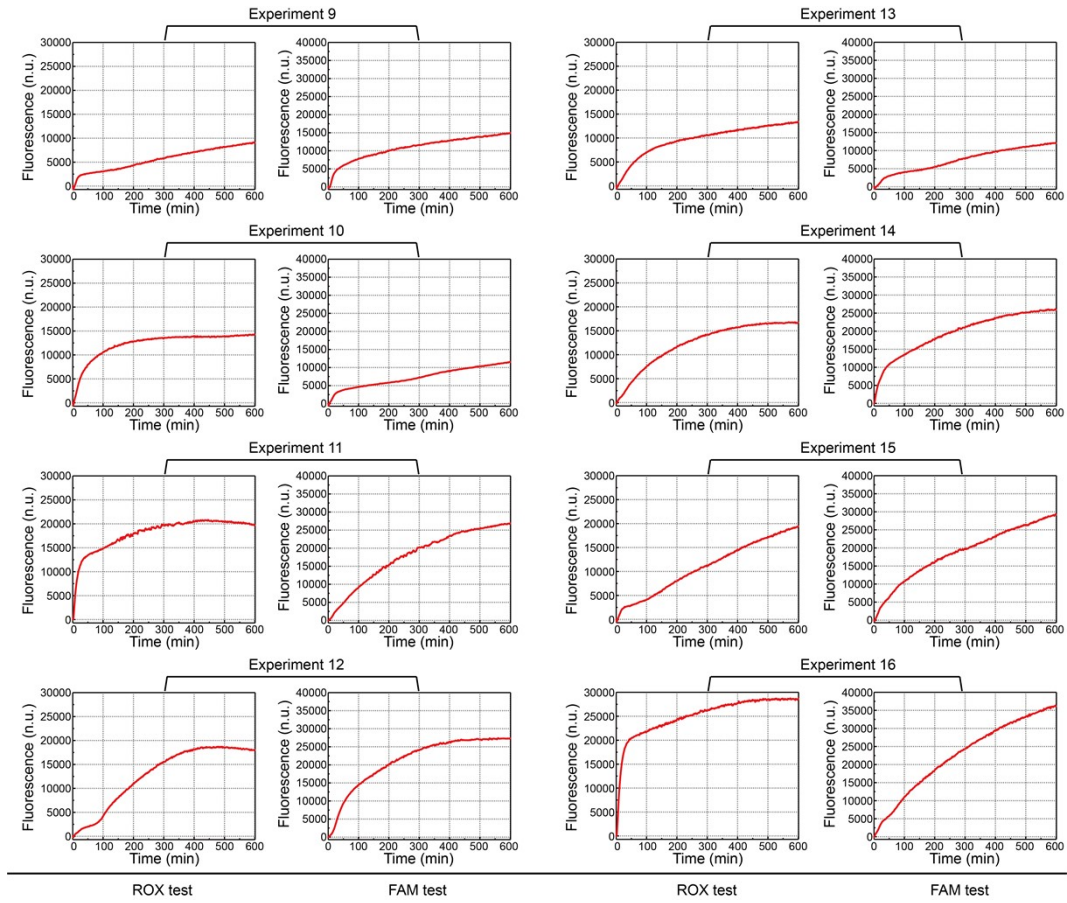

Figure S22. Experiments 9–16 in L-16 orthogonal array of Table S1.

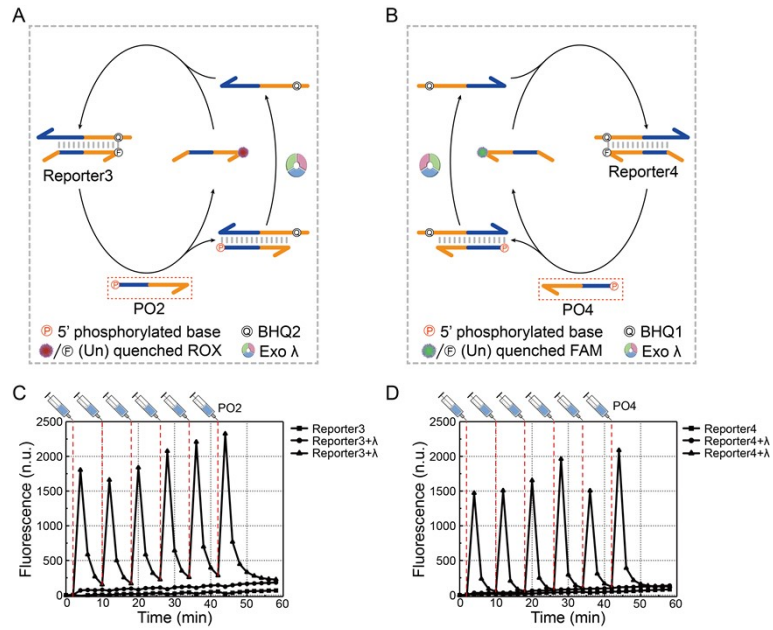

Figure S23. The redesigned reporter with signal self-restoration. Schematic illustration of Reporter3 (A) and Reporter4 (B). Six consecutive input tests on Reporter3 (C) and Reporter4 (D). The inputs and reporters are 20 pmol, and each cycle for the addition of corresponding input is 8 min.

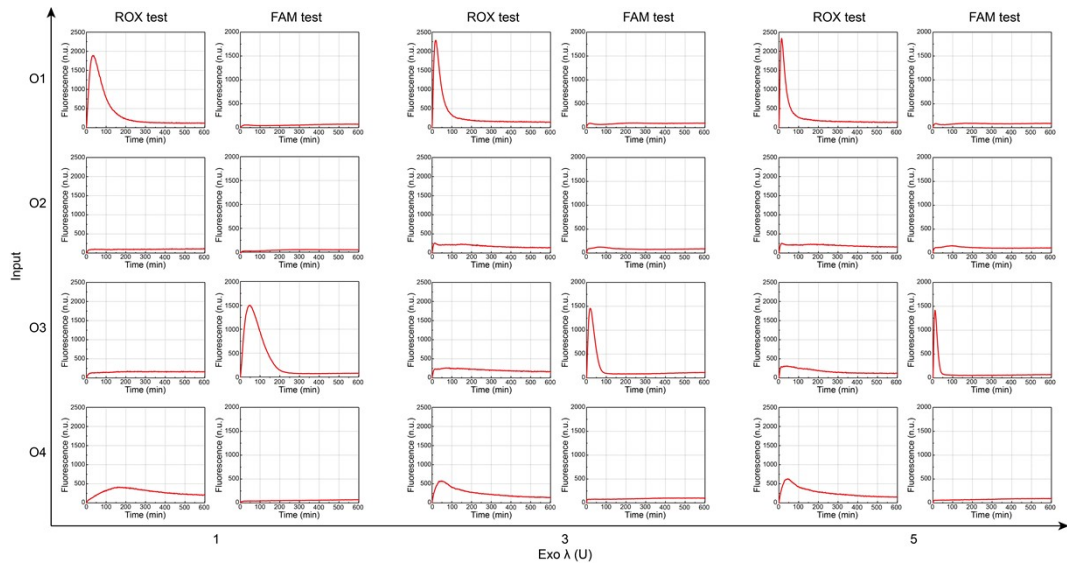

Figure S24. Pulse signal response of dual-loop molecular circuit in Fig. 5A with buffering.

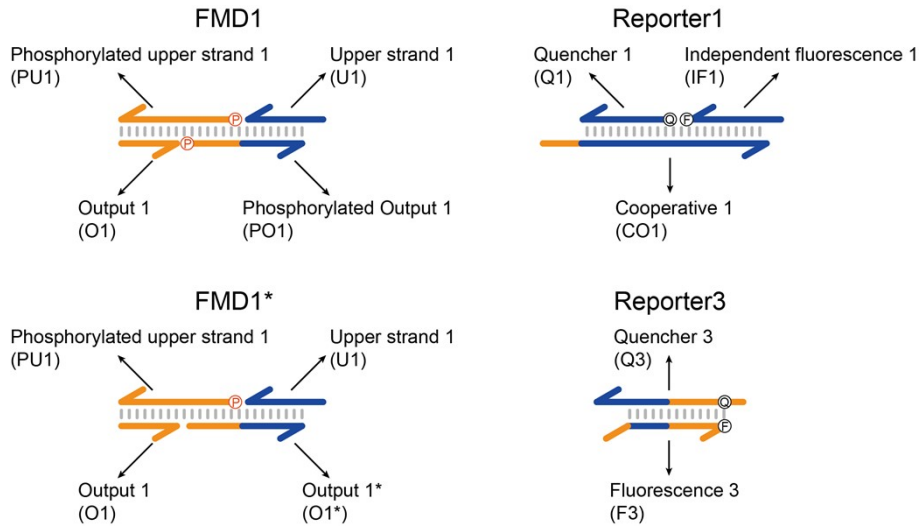

Figure S25. The naming rules for all sequence in this article. Taking FMD1 and FMD1\* as examples in FMD, the naming for other FMDs only needs to change the numbering. According to the structure of the reporter, Reporter1 and Reporter2 have the same naming rules, while Reporter3 and Reporter4 have the same naming rules.

Figure 1E

Figure 1F

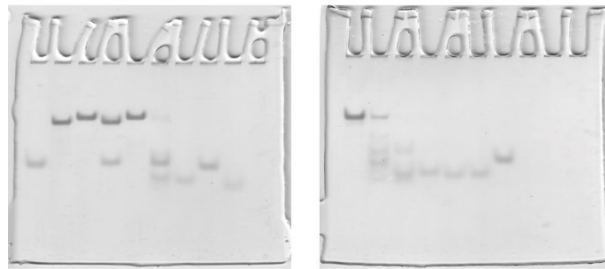

Figure S26. Uncropped and unedited gel image for Figures 1E and 1F.

Figure S3C

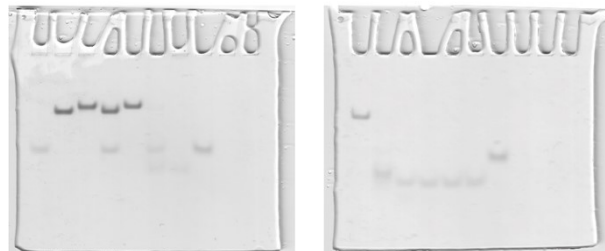

Figure S27. Uncropped and unedited gel image for Figure S3C.

Chemical reaction formula for FMD3–FMD4–FMD1:

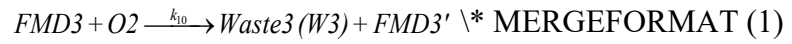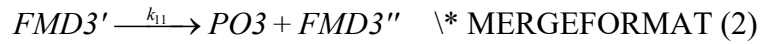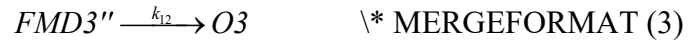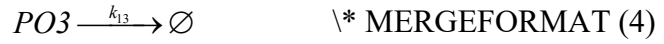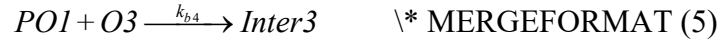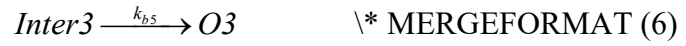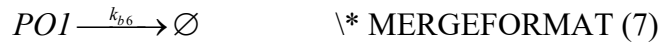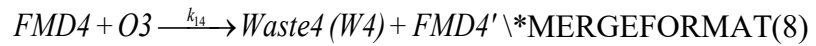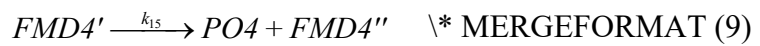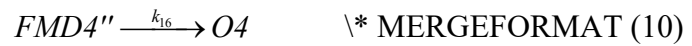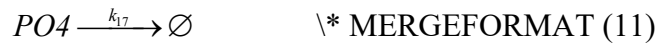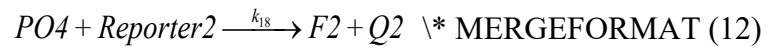



Table S1. L-16 orthogonal array of Taguchi design

| Experiment number | Cn<br>(0.01U/ $\mu$ l) | Ci<br>(0.2 $\mu$ M) | Om | Cs<br>(0.2 $\mu$ M) | Empty |
|-------------------|------------------------|---------------------|----|---------------------|-------|
| 1                 | 1 ×                    | 0.5 ×               | O1 | 3 ×                 | 1     |
| 2                 | 1 ×                    | 1.0 ×               | O2 | 4 ×                 | 2     |
| 3                 | 1 ×                    | 1.5 ×               | O3 | 5 ×                 | 3     |
| 4                 | 1 ×                    | 2.0 ×               | O4 | 6 ×                 | 4     |
| 5                 | 3 ×                    | 0.5 ×               | O2 | 5 ×                 | 4     |
| 6                 | 3 ×                    | 1.0 ×               | O1 | 6 ×                 | 3     |
| 7                 | 3 ×                    | 1.5 ×               | O4 | 3 ×                 | 2     |
| 8                 | 3 ×                    | 2.0 ×               | O3 | 4 ×                 | 1     |
| 9                 | 5 ×                    | 0.5 ×               | O3 | 6 ×                 | 2     |
| 10                | 5 ×                    | 1.0 ×               | O4 | 5 ×                 | 1     |
| 11                | 5 ×                    | 1.5 ×               | O1 | 4 ×                 | 4     |
| 12                | 5 ×                    | 2.0 ×               | O2 | 3 ×                 | 3     |
| 13                | 7 ×                    | 0.5 ×               | O4 | 4 ×                 | 3     |
| 14                | 7 ×                    | 1.0 ×               | O3 | 3 ×                 | 4     |
| 15                | 7 ×                    | 1.5 ×               | O2 | 6 ×                 | 1     |
| 16                | 7 ×                    | 2.0 ×               | O1 | 5 ×                 | 2     |

As a supplement to the fifth variable, the empty group with 4 values is used to complete the L-16 orthogonal array of Taguchi design, and the empty group will not affect the experimental results.

Table S2. Fluorescence data of the classification testing of samples 1-9 in dual loop buffering circuit.

|                           |      |      |      |      |      |      |      |      |      |
|---------------------------|------|------|------|------|------|------|------|------|------|
| Sample number             | 1    | 2    | 3    | 4    | 5    | 6    | 7    | 8    | 9    |
| True class                | O1   |
| ROX <sub>Max</sub> (a.u.) | 1363 | 1507 | 1543 | 2336 | 1573 | 1624 | 1497 | 1426 | 1694 |
| FMA <sub>Max</sub> (a.u.) | 64   | 62   | 109  | 94   | 104  | 124  | 58   | 59   | 114  |
| r                         | 1.33 | 1.39 | 1.15 | 1.40 | 1.18 | 1.12 | 1.41 | 1.38 | 1.17 |

Table S3. Fluorescence data of the classification testing of samples 10-18 in dual loop buffering circuit.

|                           |      |      |       |      |       |       |      |      |       |
|---------------------------|------|------|-------|------|-------|-------|------|------|-------|
| Sample number             | 10   | 11   | 12    | 13   | 14    | 15    | 16   | 17   | 18    |
| True class                | O2   | O2   | O2    | O2   | O2    | O2    | O2   | O2   | O2    |
| ROX <sub>Max</sub> (a.u.) | 190  | 206  | 224   | 254  | 225   | 220   | 233  | 201  | 192   |
| FMA <sub>Max</sub> (a.u.) | 155  | 156  | 338   | 156  | 332   | 307   | 178  | 152  | 325   |
| r                         | 0.09 | 0.12 | -0.18 | 0.21 | -0.17 | -0.15 | 0.12 | 0.12 | -0.23 |

Table S4. Fluorescence data of the classification testing of samples 19-27 in dual loop buffering circuit.

|                           |       |       |       |       |       |       |       |       |       |
|---------------------------|-------|-------|-------|-------|-------|-------|-------|-------|-------|
| Sample number             | 19    | 20    | 21    | 22    | 23    | 24    | 25    | 26    | 27    |
| True class                | O3    |
| ROX <sub>Max</sub> (a.u.) | 230   | 231   | 178   | 313   | 190   | 188   | 222   | 230   | 178   |
| FMA <sub>Max</sub> (a.u.) | 1218  | 1182  | 1346  | 1416  | 1246  | 1159  | 1191  | 1139  | 1287  |
| r                         | -0.72 | -0.71 | -0.88 | -0.66 | -0.82 | -0.79 | -0.73 | -0.69 | -0.86 |

Table S5. Fluorescence data of the classification testing of samples 28-36 in dual loop buffering circuit.

|                           |      |      |      |      |      |      |      |      |      |
|---------------------------|------|------|------|------|------|------|------|------|------|
| Sample number             | 28   | 29   | 30   | 31   | 32   | 33   | 34   | 35   | 36   |
| True class                | O4   |
| ROX <sub>Max</sub> (a.u.) | 544  | 544  | 490  | 632  | 549  | 531  | 560  | 571  | 532  |
| FMA <sub>Max</sub> (a.u.) | 67   | 61   | 52   | 93   | 62   | 58   | 84   | 66   | 59   |
| r                         | 0.91 | 0.95 | 0.97 | 0.83 | 0.95 | 0.96 | 0.82 | 0.94 | 0.96 |

Table S6. DNA sequences in this work.

| Hybrids       | Oligos | Sequences (from 5' to 3')                                       |
|---------------|--------|-----------------------------------------------------------------|
| FMD1          | U1     | TAAGAGTATGATAGATTGAGGA                                          |
|               | PU1    | PO <sub>4</sub> -TTGGATGGTTATTGAAGTAGTGTATGTAGTATGAGTAGGTTG     |
|               | PO1    | PO <sub>4</sub> -CTACTTCAATAACCATCCAATCCTCAATCTATCATA           |
|               | O1     | CAACCTACTCATACTACATACA                                          |
| FMD2          | U2     | TGTATGTAGTATGAGTAGGTTG                                          |
|               | PU2    | PO <sub>4</sub> -TAACTCTTCCATCATTCTATCCTAATACTCCCTAACA<br>CTTCA |
|               | PO2    | PO <sub>4</sub> -ATAGAATGATGGAAGAGTTACAACCTACTCATACTA           |
|               | O2     | TGAAGTGTTAGGGAGTATTAGG                                          |
| FMD3          | U3     | CCTAATACTCCCTAACACTTCA                                          |
|               | PU3    | PO <sub>4</sub> -ACCTACTCATACTACATACACTACTTCAATAACCATC<br>CAATC |
|               | PO3    | PO <sub>4</sub> -TGTATGTAGTATGAGTAGGTTGAAGTGTTAGGGAGT           |
|               | O3     | GATTGGATGGTTATTGAAGTAG                                          |
| FMD4          | U4     | CTACTTCAATAACCATCCAATC                                          |
|               | PU4    | PO <sub>4</sub> -ACTCACTCCAGGTTGTAAGAGTATGATAGATT<br>GAGGA      |
|               | PO4    | PO <sub>4</sub> -AGTTACAACCTGGAGTGAGTGATTGGATGGTTATTG           |
|               | O4     | TCCTCAATCTATCATACTCTTA                                          |
| FMD1*         | U1     | TAAGAGTATGATAGATTGAGGA                                          |
|               | PU1    | PO <sub>4</sub> -TTGGATGGTTATTGAAGTAGTGTATGTAGTATGAGTAGGTTG     |
|               | O1*    | CTACTTCAATAACCATCCAATCCTCAATCTATCATA                            |
|               | O1     | CAACCTACTCATACTACATACA                                          |
| FMD3*         | U3     | CCTAATACTCCCTAACACTTCA                                          |
|               | PU3    | PO <sub>4</sub> -ACCTACTCATACTACATACACTACTTCAATAACCATC<br>CAATC |
|               | O3*    | TGTATGTAGTATGAGTAGGTTGAAGTGTTAGGGAGT                            |
|               | O3     | GATTGGATGGTTATTGAAGTAG                                          |
| Reporter<br>1 | IF1    | TCACTTCTCTACCAAT-ROX                                            |

|               | Q1     | <b>BHQ2-ATAGAATGATGGAAGA</b>                                 |
|---------------|--------|--------------------------------------------------------------|
|               | CO1    | TGTA ACTCTTCCATCATTCTATATTGGTAGAGAAGTGA                      |
| Hybrids       | Oligos | Sequences (from 5' to 3')                                    |
|               | IF2    | TTTTTTCACCTTCTCTACCAAT- <b>FAM</b>                           |
| Reporter<br>2 | Q2     | <b>BHQ1-AGTTACAACCTGGAGT</b>                                 |
|               | CO2    | TTTTTTCACCTCACTCCAGGTTGTA ACTATTGGTAGAGAAGTGA                |
| Reporter<br>3 | F3     | TTTTTTAGTTACAACCAGTGTG- <b>ROX</b>                           |
|               | Q3     | TTTTTT/ <b>iBHQ2dT</b> /CACACTGGTTGTA ACTCTTCCATCATTC<br>TAT |
| Reporter<br>4 | F4     | TTTTTTTGAGTGATTGTGAGAG- <b>FAM</b>                           |
|               | Q4     | TTTTTT/ <b>iBHQ1dT</b> /CTCTCACAATCACTCACTCCAGGTTGTA<br>ACT  |

Modifications:

**PO<sub>4</sub>**: Phosphorylated modification

**FAM**: FAM modification

**BHQ1**: Black Hole Quencher 1

**/iBHQ1dT/**: Black Hole Quencher 1 modified thymine base

**ROX**: ROX modification

**BHQ2**: Black Hole Quencher 2

**/iBHQ2dT/**: Black Hole Quencher 2 modified thymine base
